# Supplementary material
Source: PubMed Central journal article supplement (PMC5503700)

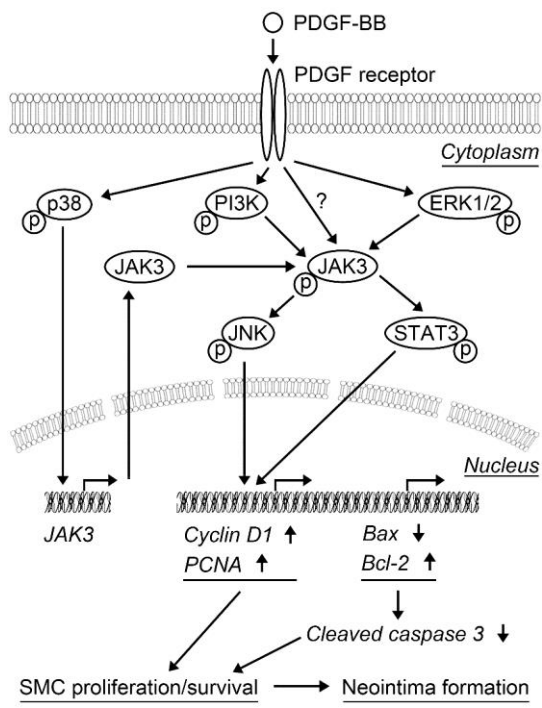

Supplement: NIHMS871469-supplement-Graphic_Abstract.pdf [file NIHMS871469-supplement-Graphic_Abstract.pdf]
